# Supplementary material
Source: HighWire-hosted journal article supplement (https://erj.ersjournals.com/content/52/2/1702484)
Supplement: inline-supplementary-material-1 [file inline-supplementary-material-1.pdf]

**Supplementary Table S1.** Impact of a 10 events per hour increase in REM-AHI on the prevalence of comorbidities.

|                          | Metabolic Syndrome |                   | Diabetes           |              | Hypertension       |         | Depression         |         |
|--------------------------|--------------------|-------------------|--------------------|--------------|--------------------|---------|--------------------|---------|
|                          | OR (95% CI)        | p-value           | OR (95% CI)        | p-value      | OR (95% CI)        | p-value | OR (95% CI)        | p-value |
| <b>REM-AHI, events/h</b> |                    |                   |                    |              |                    |         |                    |         |
| Entire cohort            | 1.10 (1.02 - 1.18) | <b>0.012</b>      | 1.08 (1.00 - 1.18) | 0.127        | 1.04 (1.00 - 1.11) | 0.258   | 1.10 (1.00 - 1.25) | 0.160   |
| NREM-AHI<10 subgroup     | 1.26 (1.12 - 1.40) | <b>&lt;0.0001</b> | 1.26 (1.07 - 1.46) | <b>0.007</b> | 1.08 (1.00 - 1.21) | 0.195   | 1.18 (1.00 - 1.40) | 0.117   |
| AHI<10 subgroup          | 1.31 (1.08 - 1.55) | <b>0.009</b>      | 1.41 (1.05 - 1.79) | <b>0.024</b> | 1.10 (0.99 - 1.30) | 0.317   | 1.20 (0.98 - 1.60) | 0.302   |

Definition of abbreviations: AHI = apnoea–hypopnoea index; CI = confidence interval; OR = Odds ratio; REM = rapid eye movement.

Data analyzed by multivariable-adjusted logistic regression. Cardiovascular and metabolic comorbidities were adjusted for age, sex, body mass index, waist-to-hip ratio, total sleep time, smoking, alcohol consumption (weekly) and non-REM AHI (NREM-AHI). Depression was adjusted for age, gender, consumption of benzodiazepines and antidepressants and log-NREM-AHI.

Number of participants with missing data in the models (entire cohort, NREM-AHI<10, AHI<10): systolic blood pressure and diastolic blood pressure (16, 6, 5).

Number of participants with missing data in the models of the entire cohort (REM-AHI, REM-AHI in supine, REM-AHI non-supine): metabolic syndrome (entire cohort: 35, 424, 35; NREM-AHI<10 subgroup: 13, 223, 13; AHI<10 subgroup: 11, 203, 11); diabetes (entire cohort: 37, 426, 37; NREM-AHI<10 subgroup: 13, 223, 13; AHI<10 subgroup: 11, 203, 11); hypertension (entire cohort: 37, 426, 37; NREM-AHI<10 subgroup: 14, 224, 14; AHI<10 subgroup: 11, 203, 11); depression (entire cohort: 389, 720, 389; NREM-AHI<10 subgroup: 226, 410, 226; AHI<10 subgroup: 189, 358, 189).

**Supplementary Table S2.** Associations between REM-AHI and blood pressure in participants free of antihypertensive drug use.

|                                 | Entire cohort<br>n=1531 |         | NREM-AHI<10 subgroup<br>n=1004 |         | AHI<10 subgroup<br>n=866 |         |
|---------------------------------|-------------------------|---------|--------------------------------|---------|--------------------------|---------|
|                                 | $\beta$                 | p-value | $\beta$                        | p-value | $\beta$                  | p-value |
| <b>Systolic blood pressure</b>  | 0.02                    | 0.285   | 0.00                           | 0.864   | 0.01                     | 0.772   |
| REM-AHI (continuous)            | 0.01                    | 0.785   | -0.01                          | 0.886   | 0.04                     | 0.499   |
| 5-9.9/h                         | 1.27                    | 0.274   | 1.03                           | 0.393   | 0.96                     | 0.422   |
| 10-19.9/h                       | 0.81                    | 0.469   | 1.90                           | 0.125   | 2.02                     | 0.108   |
| $\geq 20$ /h                    | 0.47                    | 0.680   | 0.33                           | 0.815   | 0.18                     | 0.925   |
| <b>Diastolic blood pressure</b> |                         |         |                                |         |                          |         |
| REM-AHI (continuous)            | 0.02                    | 0.285   | 0.00                           | 0.864   | 0.01                     | 0.772   |
| 5-9.9/h                         | 0.92                    | 0.229   | 1.02                           | 0.202   | 0.96                     | 0.225   |
| 10-19.9/h                       | 0.56                    | 0.446   | 1.04                           | 0.202   | 1.06                     | 0.196   |
| $\geq 20$ /h                    | 1.00                    | 0.183   | 0.29                           | 0.754   | -0.35                    | 0.779   |

Definition of abbreviations: AHI = apnoea–hypopnoea index;  $\beta$  = linear regression coefficient beta; NREM = non-rapid eye movement; REM = rapid eye movement.

Data analyzed by linear regression using REM-AHI as continuous or dummy variable with adjustment for age, sex, body mass index, waist-to-hip ratio, total sleep time, smoking, alcohol consumption (weekly), and log-NREM-AHI.

Number of participants with missing data in the models (entire cohort, NREM-AHI<10, AHI<10): systolic blood pressure and diastolic blood pressure (11, 5, 4).
